# Supplementary material
Source: PubMed Central journal article supplement (PMC1578705)
Supplement: rspb20042963s03.pdf [file rspb20042963s03.pdf]

# ELECTRONIC APPENDIX

This is the Electronic Appendix to the article

**Low effective population size and evidence  
for inbreeding in an overexploited flatfish,  
plaice (*Pleuronectes platessa* L.)**

by

Galice Hoarau, Eva Boon, Dorris N. Jongma, Steven Ferber,  
Jonbjorn Palsson, Henk W. Van der Veer, Adriaan D. Rijnsdorp,  
Wytze T. Stam and Jeanine L. Olsen

*Proc. R. Soc. B* (doi:10.1098/rspb.2004.2963)

Electronic appendices are refereed with the text; however, no attempt is made  
to impose a uniform editorial style on the electronic appendices.

**Table S1.** Summary of genetic variation at eight microsatellite loci on both juvenile and otolith samples.  $N$  = sample size,  $N_A$  = number of alleles,  $H_e$  = unbiased expected heterozygosity (Nei 1978),  $H_{obs}$  = observed heterozygosity, and  $f$  = inbreeding coefficient (Weir and Cockerham 1984). <sup>NS</sup> = not significant, \*  $P < 0.05$ , \*\*  $P < 0.01$ , \*\*\*  $P < 0.001$ .  $P$ -values have been corrected for multiple tests.

|                         |           | Balgzand (The Netherlands) 2002-juveniles |                   |                   |                   |                   | North Sea-otoliths |        | Alftanes (Iceland) 2002-juveniles |                   |                   |                   | Iceland-otoliths  |        |        |                  |
|-------------------------|-----------|-------------------------------------------|-------------------|-------------------|-------------------|-------------------|--------------------|--------|-----------------------------------|-------------------|-------------------|-------------------|-------------------|--------|--------|------------------|
| Cohort 0 (eggs)         |           | 1                                         | 2                 | 3                 | 4                 | 5                 | 1950               | 1970   | 1                                 | 2                 | 3                 | 4                 | 1924              | 1948   | 1972   |                  |
| <i>Sampling week</i>    | -         | -                                         | 1                 | 3                 | 7                 | 9                 | -                  | -      | 1                                 | 5                 | 7                 | 11                | -                 | -      | -      |                  |
| <i>Mean length (mm)</i> | -         | -                                         | 14.6              | 14.5              | 13.3              | 29.2              | -                  | -      | 15.5                              | 15                | 28.5              | 53                | -                 | -      | -      |                  |
| <i>N</i>                | 64        | 64                                        | 64                | 61                | 48                | 48                | 50                 | 64     | 37                                | 52                | 52                | 51                | 64                | 64     | 64     |                  |
| Locus                   |           |                                           |                   |                   |                   |                   |                    |        |                                   |                   |                   |                   |                   |        |        |                  |
| PL06                    | $N_A$     | 29                                        | 31                | 27                | 21                | 24                | 28                 | -      | -                                 | 25                | 26                | 25                | 25                | -      | -      | -                |
|                         | $H_e$     | 0.9503                                    | 0.9630            | 0.9206            | 0.9524            | 0.9595            | 0.9640             | -      | -                                 | 0.9288            | 0.9123            | 0.9108            | 0.9349            | -      | -      | -                |
|                         | $H_{obs}$ | 0.5806                                    | 0.5918            | 0.667             | 0.3182            | 0.5455            | 0.6000             | -      | -                                 | 0.5143            | 0.3750            | 0.3617            | 0.5600            | -      | -      | -                |
|                         | $f$       | <b>0.3909</b> ***                         | <b>0.3879</b> *** | <b>0.2775</b> *** | <b>0.6711</b> *** | <b>0.4375</b> *** | <b>0.3810</b> ***  | -      | -                                 | <b>0.4499</b> *** | <b>0.5915</b> *** | <b>0.6055</b> *** | <b>0.4035</b> *** | -      | -      | -                |
| PL09                    | $N_A$     | 24                                        | 28                | 29                | 29                | 27                | 25                 | --     | -                                 | 14                | 17                | 19                | 12                | -      | -      | -                |
|                         | $H_e$     | 0.9416                                    | 0.8516            | 0.9128            | 0.9102            | 0.9517            | 0.9397             | -      | -                                 | 0.5542            | 0.6154            | 0.6892            | 0.5797            | -      | -      | -                |
|                         | $H_{obs}$ | 0.5882                                    | 0.4375            | 0.5000            | 0.5667            | 0.4894            | 0.5000             | -      | -                                 | 0.4000            | 0.4490            | 0.5882            | 0.5882            | -      | -      | -                |
|                         | $F$       | <b>0.3788</b> ***                         | <b>0.4882</b> *** | <b>0.4543</b> *** | <b>0.3794</b> *** | <b>0.4885</b> *** | <b>0.4708</b> ***  | -      | -                                 | <b>0.2817</b> *** | <b>0.2725</b> *** | <b>0.1477</b> *   | -0.0149           | -      | -      | -                |
| PL92                    | $N_A$     | 22                                        | 28                | 25                | 25                | 20                | 28                 | 19     | 21                                | 15                | 18                | 15                | 15                | 12     | 12     | 14               |
|                         | $H_e$     | 0.9023                                    | 0.9248            | 0.9010            | 0.8964            | 0.9129            | 0.9092             | 0.881  | 0.901                             | 0.9143            | 0.8951            | 0.8910            | 0.8604            | 0.804  | 0.727  | 0.733            |
|                         | $H_{obs}$ | 0.7500                                    | 0.8906            | 0.8281            | 0.8197            | 0.8958            | 0.8723             | 0.859  | 0.861                             | 0.7222            | 0.8077            | 0.7692            | 0.8627            | 0.823  | 0.746  | 0.719            |
|                         | $F$       | <b>0.1699</b> ***                         | 0.0373            | <b>0.0814</b> *   | <b>0.0862</b> **  | 0.0189            | 0.0409             | 0.024  | 0.046                             | <b>0.2125</b> *** | 0.0985            | <b>0.1378</b> **  | -0.0027           | -0.023 | -0.027 | 0.019            |
| PL115                   | $N_A$     | 15                                        | 17                | 19                | 16                | 21                | 17                 | 12     | 18                                | 12                | 12                | 15                | 12                | 19     | 19     | 13               |
|                         | $H_e$     | 0.7158                                    | 0.7307            | 0.7575            | 0.8025            | 0.7618            | 0.7580             | 0.644  | 0.765                             | 0.6964            | 0.7644            | 0.8083            | 0.7449            | 0.877  | 0.878  | 0.878            |
|                         | $H_{obs}$ | 0.5556                                    | 0.6557            | 0.7969            | 0.6066            | 0.7500            | 0.5957             | 0.660  | 0.656                             | 0.5278            | 0.5385            | 0.7885            | 0.6078            | 0.807  | 0.828  | 0.797            |
|                         | $F$       | <b>0.2253</b> ***                         | <b>0.1033</b> *   | -0.0524           | <b>0.2457</b> *** | 0.01571           | <b>0.2158</b> ***  | -0.024 | 0.143                             | <b>0.2448</b> *** | <b>0.2976</b> *** | 0.0247            | <b>0.1855</b> *** | 0.081  | 0.057  | <b>0.093</b> *** |
| PL142                   | $N_A$     | 24                                        | 29                | 25                | 25                | 22                | 21                 | 19     | 20                                | 18                | 21                | 20                | 18                | 14     | 19     | 18               |
|                         | $H_e$     | 0.8984                                    | 0.8970            | 0.8625            | 0.8724            | 0.9075            | 0.8463             | 0.876  | 0.843                             | 0.8878            | 0.9108            | 0.8956            | 0.8790            | 0.827  | 0.872  | 0.868            |
|                         | $H_{obs}$ | 0.8281                                    | 0.7031            | 0.8095            | 0.8361            | 0.6875            | 0.5208             | 0.796  | 0.641                             | 0.7838            | 0.8846            | 0.8462            | 0.5800            | 0.741  | 0.850  | 0.688            |
|                         | $F$       | <b>0.0788</b> *                           | <b>0.2175</b> *** | 0.0619            | 0.0419            | <b>0.2443</b> *** | <b>0.3871</b> ***  | 0.093  | <b>0.242</b> ***                  | <b>0.1186</b> *   | 0.0290            | 0.0558            | <b>0.3424</b> *** | 0.106  | 0.026  | <b>0.209</b> *** |
| PL167                   | $N_A$     | 32                                        | 35                | 31                | 37                | 32                | 40                 | 34     | 34                                | 24                | 28                | 26                | 27                | 22     | 25     | 22               |
|                         | $H_e$     | 0.9563                                    | 0.9856            | 0.9451            | 0.9553            | 0.9638            | 0.9678             | 0.957  | 0.957                             | 0.9354            | 0.9390            | 0.9341            | 0.9321            | 0.935  | 0.922  | 0.918            |
|                         | $H_{obs}$ | 0.6271                                    | 0.8906            | 0.7031            | 0.7869            | 0.6250            | 0.8750             | 0.698  | 0.857                             | 0.6944            | 0.6863            | 0.7500            | 0.8039            | 0.836  | 0.817  | 0.844            |

|          |                                                   |                             |                             |                             |                             |                             |                             |                            |                            |                             |                             |                             |                             |                          |                           |                            |
|----------|---------------------------------------------------|-----------------------------|-----------------------------|-----------------------------|-----------------------------|-----------------------------|-----------------------------|----------------------------|----------------------------|-----------------------------|-----------------------------|-----------------------------|-----------------------------|--------------------------|---------------------------|----------------------------|
|          | <i>F</i>                                          | <b>0.3461<sup>***</sup></b> | <b>0.0782<sup>**</sup></b>  | <b>0.2576<sup>***</sup></b> | <b>0.1775<sup>***</sup></b> | <b>0.3539<sup>***</sup></b> | <b>0.0968<sup>***</sup></b> | <b>0.105<sup>*</sup></b>   | <b>0.272<sup>***</sup></b> | <b>0.2604<sup>***</sup></b> | <b>0.2711<sup>***</sup></b> | <b>0.1986<sup>***</sup></b> | <b>0.1387<sup>***</sup></b> | <b>0.106<sup>*</sup></b> | <b>0.115<sup>**</sup></b> | <b>0.082<sup>**</sup></b>  |
| List1001 | $N_A$                                             | 5                           | 7                           | 5                           | 6                           | 6                           | 6                           | 5                          | 9                          | 5                           | 8                           | 5                           | 5                           | 7                        | 6                         | 6                          |
|          | $H_e$                                             | 0.5863                      | 0.5687                      | 0.6654                      | 0.5789                      | 0.6147                      | 0.6504                      | 0.586                      | 0.620                      | 0.7693                      | 0.7562                      | 0.7397                      | 0.7290                      | 0.769                    | 0.755                     | 0.736                      |
|          | $H_{obs}$                                         | 0.6032                      | 0.5938                      | 0.7031                      | 0.5000                      | 0.5417                      | 0.6042                      | 0.596                      | 0.672                      | 0.7297                      | 0.7308                      | 0.8077                      | 0.7451                      | 0.781                    | 0.797                     | 0.719                      |
|          | <i>F</i>                                          | -0.0290                     | -0.0445                     | -0.0572                     | 0.1372                      | 0.1193                      | 0.0718                      | -0.017                     | -0.084                     | 0.0522                      | 0.0339                      | -0.0929                     | -0.0223                     | -0.017                   | -0.055                    | 0.023                      |
| List1003 | $N_A$                                             | 9                           | 9                           | 7                           | 12                          | 11                          | 7                           | 8                          | 9                          | 6                           | 7                           | 6                           | 5                           | 6                        | 7                         | 8                          |
|          | $H_e$                                             | 0.3878                      | 0.4599                      | 0.4401                      | 0.4364                      | 0.5548                      | 0.4406                      | 0.478                      | 0.477                      | 0.3580                      | 0.3182                      | 0.4757                      | 0.4122                      | 0.355                    | 0.360                     | 0.380                      |
|          | $H_{obs}$                                         | 0.4127                      | 0.4688                      | 0.4219                      | 0.4590                      | 0.5625                      | 0.4375                      | 0.578                      | 0.531                      | 0.3514                      | 0.2941                      | 0.5000                      | 0.4118                      | 0.406                    | 0.349                     | 0.422                      |
|          | <i>f</i>                                          | -0.0647                     | -0.0194                     | 0.0417                      | -0.0523                     | -0.0139                     | 0.0070                      | <b>-0.211<sup>**</sup></b> | 0.115                      | 0.0189                      | 0.0764                      | -0.0516                     | 0.0010                      | -0.145                   | 0.031                     | 0.111                      |
| <hr/>    |                                                   |                             |                             |                             |                             |                             |                             |                            |                            |                             |                             |                             |                             |                          |                           |                            |
|          | Mean $N_A$ ,<br>excluding PL06 &<br>PL09          | 17.8                        | 20.8                        | 18.7                        | 20.2                        | 18.7                        | 19.8                        | 16.2                       | 18.5                       | 13.3                        | 15.7                        | 14.5                        | 13.7                        | 13.3                     | 14.7                      | 13.5                       |
|          | Multilocus $H_e$ ,<br>excluding PL06 &<br>PL09    | 0.7411                      | 0.7611                      | 0.7619                      | 0.7569                      | 0.7857                      | 0.7620                      | 0.7370                     | 0.7605                     | 0.7602                      | 0.7639                      | 0.7907                      | 0.7596                      | 0.7612                   | 0.7523                    | 0.7521                     |
|          | Multilocus <i>f</i>                               | <b>0.2215<sup>***</sup></b> | <b>0.1788<sup>***</sup></b> | <b>0.1534<sup>***</sup></b> | <b>0.2387<sup>***</sup></b> | <b>0.2333<sup>***</sup></b> | <b>0.2291<sup>***</sup></b> | -                          | -                          | <b>0.2210<sup>***</sup></b> | <b>0.2219<sup>***</sup></b> | <b>0.1484<sup>***</sup></b> | <b>0.1516<sup>***</sup></b> | -                        | -                         | -                          |
|          | Multilocus <i>f</i> ,<br>excluding PL06 &<br>PL09 | <b>0.1518<sup>***</sup></b> | <b>0.0762<sup>**</sup></b>  | <b>0.0680<sup>**</sup></b>  | <b>0.1183<sup>***</sup></b> | <b>0.1397<sup>***</sup></b> | <b>0.1471<sup>***</sup></b> | 0.017 <sup>NS</sup>        | <b>0.111<sup>***</sup></b> | <b>0.1668<sup>***</sup></b> | <b>0.1412<sup>***</sup></b> | <b>0.0602<sup>**</sup></b>  | <b>0.1209<sup>***</sup></b> | 0.038 <sup>NS</sup>      | 0.028 <sup>NS</sup>       | <b>0.072<sup>***</sup></b> |

**Table S2.** Microsatellite data quality. n.t.= not tested .

|                                                    | Microsatellite loci |                  |      |        |          |          |          |          |
|----------------------------------------------------|---------------------|------------------|------|--------|----------|----------|----------|----------|
|                                                    | PL06                | PL09             | PL92 | PL115  | PL142    | PL167    | List1001 | List1003 |
| Amplification failure                              | 4%                  | 4%               | <1%  | 0      | 0        | <1%      | <1%      | 0        |
| Stuttering                                         | no                  | no               | no   | slight | moderate | moderate | no       | no       |
| Brookfield test                                    | yes                 | yes              | no   | no     | no       | no       | no       | no       |
| Presence of null alleles                           |                     |                  |      |        |          |          |          |          |
| Effect of relaxed annealing temperature.           |                     |                  | none | none   | none     | none     | none     | none     |
| Large allele drop-out                              | Locus eliminated    | Locus eliminated | no   | no     | no       | no       | no       | no       |
| New PCR primers designed                           |                     |                  | no   | no     | yes      | yes      | no       | no       |
| Effect of new primers on the number of homozygotes |                     |                  | n.t  | n.t    | none     | none     | n.t      | n.t      |

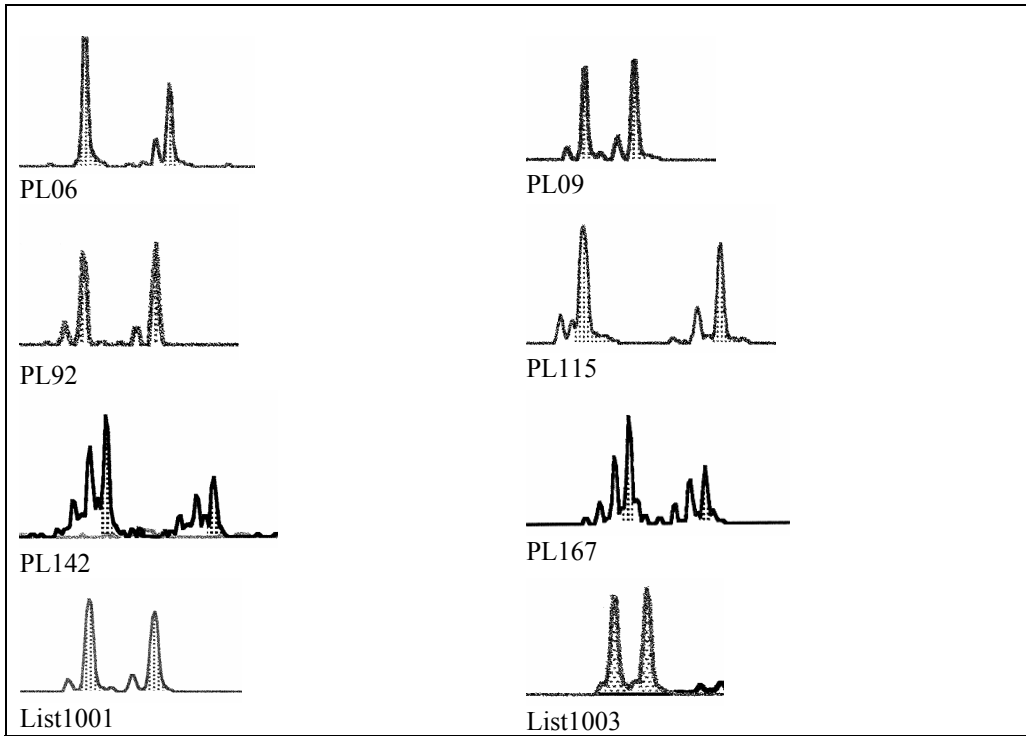

**Fig. S1.** Peak shapes as indicator of microsatellite data quality.
